# Supplementary material for: COVID-19 Prophylactic Effect of Bromhexine Hydrochloride
Source: Preprints.org preprint supplement (doi:10.20944/preprints202410.1998.v1), 2024-10-25
Supplement: Supplementary file 1 [file supplementary]

**Supplementary Table 1**

**Patients treated with BRH**

| **Patient ID** | **Number of Tablets daily** | **Duration of prophylactic treatment (days)** | **Daily intake in mg** | **Overall milligrams taken during the entire period** |
| --- | --- | --- | --- | --- |
| 1 | 3 | 10 | 24 | 240 |
| 2 | 6 | 20 | 48 | 960 |
| 3 | 6 | 20 | 48 | 960 |
| 4 | 16 | 10 | 128 | 1280 |
| 5 | 6 | 24 | 48 | 1152 |
| 6 | 6 | 10 | 48 | 480 |
| 7 | 1 | 28 | 8 | 224 |
| 8 | 4 | 28 | 32 | 896 |
| 9 | 6 | 14 | 48 | 672 |
| 10 | 3 | 20 | 24 | 480 |
| 11 | 1 | 30 | 8 | 240 |
| 12 | 3 | 30 | 24 | 720 |
| 13 | 3 | 30 | 24 | 720 |
| 14 | 6 | 30 | 48 | 1440 |
| 15 | 9 | 14 | 72 | 1008 |
| 16 | 3 | 20 | 24 | 480 |
| 17 | 6 | 30 | 48 | 1440 |
| 18 | 6 | 20 | 48 | 960 |
| 19 | 10 | 16 | 80 | 1280 |
| 20 | 6 | 20 | 48 | 960 |
| 21 | 6 | 20 | 48 | 960 |
| 22 | 6 | 20 | 48 | 960 |
| 23 | 3 | 10 | 24 | 240 |
| 24 | 6 | 365 | 48 | 17520 |
| 25 | 6 | 12 | 48 | 576 |
| 26 | 6 | 10 | 48 | 480 |
| 27 | 6 | 14 | 48 | 672 |
| 28 | 8 | 14 | 64 | 896 |
| 29 | 8 | 14 | 64 | 896 |
| 30 | 8 | 10 | 64 | 640 |
| 31 | 8 | 14 | 64 | 896 |
| 32 | 8 | 14 | 64 | 896 |
| 33 | 8 | 10 | 64 | 640 |
| 34 | 8 | 10 | 64 | 640 |
| 35 | 6 | 14 | 48 | 672 |
| 36 | 8 | 14 | 64 | 896 |
| 37 | 8 | 20 | 64 | 1280 |
| 38 | 8 | 10 | 64 | 640 |
| 39 | 8 | 14 | 64 | 896 |
| 40 | 8 | 14 | 64 | 896 |
| 41 | 8 | 10 | 64 | 640 |
| 42 | 8 | 14 | 64 | 896 |
| 43 | 6 | 14 | 48 | 672 |
| 44 | 8 | 10 | 64 | 640 |
| 45 | 8 | 14 | 64 | 896 |
| 46 | 8 | 14 | 64 | 896 |
| 47 | 6 | 10 | 48 | 480 |
| 48 | 8 | 14 | 64 | 896 |
| 49 | 8 | 14 | 64 | 896 |
| 50 | 8 | 20 | 64 | 1280 |
| 51 | 8 | 14 | 64 | 896 |
| 52 | 8 | 14 | 64 | 896 |
| 53 | 8 | 14 | 64 | 896 |
| 54 | 8 | 14 | 64 | 896 |
| 55 | 6 | 10 | 48 | 480 |
| 56 | 6 | 14 | 48 | 672 |
| 57 | 6 | 10 | 48 | 480 |
| 58 | 6 | 14 | 48 | 672 |
| 59 | 6 | 14 | 48 | 672 |
| 60 | 8 | 10 | 64 | 640 |
| 61 | 3 | 61 | 24 | 1464 |
| 62 | 3 | 61 | 24 | 1464 |
| 63 | 6 | 20 | 48 | 960 |
| 64 | 3 | 15 | 24 | 360 |
| 65 | 3 | 61 | 24 | 1464 |
| 66 | 3 | 91.5 | 24 | 2196 |
| 67 | 3 | 152.5 | 24 | 3660 |
| 68 | 3 | 122 | 24 | 2928 |
| 69 | 3 | 122 | 24 | 2928 |
| 70 | 3 | 122 | 24 | 2928 |
| 71 | 3 | 183 | 24 | 4392 |
| 72 | 3 | 90 | 24 | 2160 |
| 73 | 6 | 183 | 48 | 8784 |
| 74 | 3 | 183 | 24 | 4392 |
| 75 | 3 | 61 | 24 | 1464 |
| 76 | 3 | 30 | 24 | 720 |
| 77 | 3 | 61 | 24 | 1464 |
| 78 | 3 | 61 | 24 | 183 |
| 79 | 3 | 183 | 24 | 549 |
| 80 | 3 | 183 | 24 | 549 |
| 81 | 3 | 183 | 24 | 549 |
| 82 | 3 | 183 | 24 | 549 |
| 83 | 3 | 61 | 24 | 183 |
| 84 | 3 | 61 | 24 | 183 |
| 85 | 3 | 61 | 24 | 183 |
| 86 | 3 | 61 | 24 | 183 |
| 87 | 3 | 61 | 24 | 183 |
| 88 | 3 | 61 | 24 | 183 |
| 89 | 3 | 61 | 24 | 183 |
| 90 | 3 | 61 | 24 | 183 |
| 91 | 3 | 61 | 24 | 183 |
| 92 | 3 | 61 | 24 | 183 |
| 93 | 3 | 61 | 24 | 183 |
| 94 | 2 | 91.5 | 16 | 183 |
| 95 | 2 | 91.5 | 16 | 183 |
| 96 | 3 | 91.5 | 24 | 274.5 |
| 97 | 2 | 91.5 | 16 | 183 |
| 98 | 3 | 91.5 | 24 | 274.5 |
| 99 | 6 | 10 | 48 | 480 |
| 100 | 3 | 20 | 24 | 480 |
| 101 | 3 | 28 | 24 | 672 |
| 102 | 6 | 40 | 48 | 1920 |
| 103 | 3 | 45 | 24 | 1080 |
| 104 | 3 | 40 | 24 | 960 |
| 105 | 6 | 50 | 48 | 2400 |
| 106 | 6 | 60 | 48 | 2880 |
| 107 | 6 | 45 | 48 | 2160 |
| 108 | 6 | 30 | 48 | 1440 |
| 109 | 3 | 35 | 24 | 840 |
| 110 | 6 | 40 | 48 | 1920 |
| 111 | 6 | 65 | 48 | 3120 |
| 112 | 6 | 60 | 48 | 2880 |
| 113 | 3 | 50 | 24 | 1200 |
| 114 | 6 | 35 | 48 | 1680 |
| 115 | 6 | 60 | 48 | 2880 |
| 116 | 6 | 40 | 48 | 1920 |
| 117 | 6 | 45 | 48 | 2160 |
| 118 | 6 | 50 | 48 | 2400 |
| 119 | 3 | 20 | 24 | 480 |
| 120 | 6 | 40 | 48 | 1920 |
| 121 | 3 | 30 | 24 | 720 |
| 122 | 6 | 55 | 48 | 2640 |
| 123 | 3 | 30 | 24 | 720 |
| 124 | 3 | 10 | 24 | 240 |
| 125 | 3 | 10 | 24 | 240 |
