# Supplementary material for: COVID-19 Prophylactic Effect of Bromhexine Hydrochloride
Source: Preprints.org preprint supplement (doi:10.20944/preprints202410.1998.v1), 2024-10-25
Supplement: Supplementary file 3 [file BRH Supplementary Table 2.docx]

**Supplementary Table 2**

**Post COVID-19 symptomatic and BRH intake**

| Responder’s sex and age | BMI | List of post-covid symptoms | Number of post-covid symptoms | Comorbidities | Smoking status | Duration of BRH Intake |
| --- | --- | --- | --- | --- | --- | --- |
| Male – 67 | 23.45 | Tiredness  Cough  Persistent high temperature  Headaches  Loss of sense of smell | 5 | Hypertension | Never smoker | 14 days |
| Female – 58 | 24.72 | Cough  Persistent high temperature  Headaches | 3 | Hypertension | Never smoker | 10 days |
| Female - 43 | 21.38 | Tiredness  Cough  Persistent high temperature  Pain in muscles and joints  Headache | 5 | None | Never smoker | 14 days |
| Male – 32 | 33.87 | Tiredness  Cough  Persistent high temperature | 4 | None | Never smoker | 14 days |
| Female – 64 | 21.3 | Tiredness  Cough  Persistent high temperature  Headache  Loss of sense of smell | 5 | None | Never smoker | 14 days |
| Female – 30 | 35.98 | Tiredness  Shortness of breath  Cough  Chest discomfort  Persistent high temperature  Headache  Pain in muscle or joints | 7 | None | Never smoker | 14 days |
| Male – 75 | 35.92 | Tiredness  Shortness of Breath  Cough  Chest discomfort  Persistent high temperature  Pain in joints and muscles  Headache | 7 | Hypertension | Never Smoker | 14 days |
| Female - 43 | 20.4 | Tiredness  Cough  Persistent high temperature  Pain in muscles and joints  Headache | 5 | None | Never smoker | 14 days |
